# Supplementary material
Source: Springer Nature journal article supplement (https://www.springermedizin.de/resource/supplementary/12889_2010_3230_MOESM3_ESM.pdf/9488436)

Premolar teeth

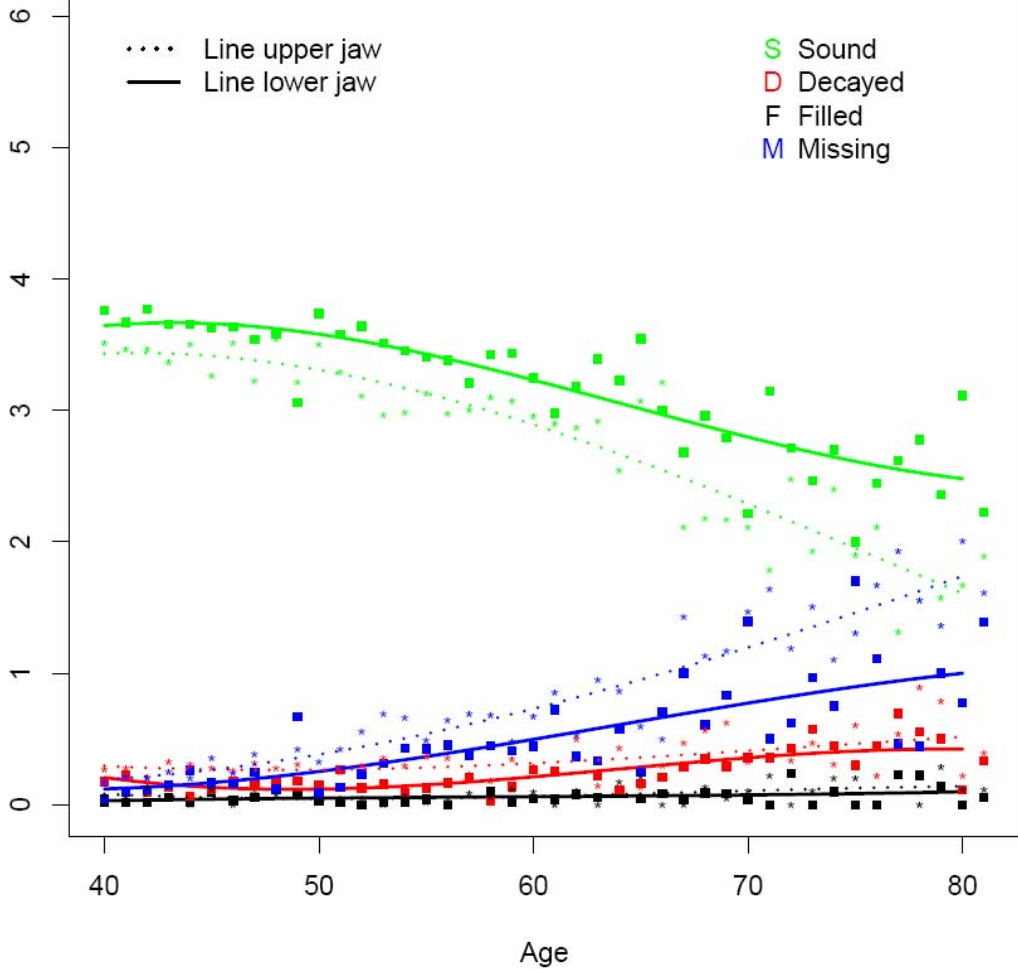

Supplement: MOESM3 [file 9488436]
